# Supplementary material for: Rab4a Drives Proinflammatory CD4+ T Cell Signaling via CD38-Dependent NAD+ Metabolism
Source: Research Square preprint supplement (doi:10.21203/rs.3.rs-6787101/v1), 2025-06-12
Supplement: Supplementary file 1 [file ccd7b34702faf49245bc1b4a.xlsx]

## Sheet: Fig. 1A
Fig. 1A
Separate culture repeats (n = 6)																																									Experiment date: 9/19/2021
CD38 MFI																				CD4 MFI																					Separate culture repeats (n = 6)
	Control						Rab4A+						Rab4ADN								Control						Rab4A+						Rab4ADN								Jurkats		cells/Single Cells/Single Cells | Geometric Mean (CD38)	cells/Single Cells/Single Cells | Geometric Mean (CD4)
No DOXY	17990	18046	17026	16695	17206	16900	49799	51885	47734	48932	49909	49802	17299	20171	19292	20221	20468	20403		No DOXY	2292	2367	2705	3189	2677	2856	1098	1774	1358	1264	1637	1403	26530	29239	28623	29195	28278	27443			4480_1.fcs	Control	17990	2292
DOXY	16894	17740	17227	17352	16799	17216	55603	54392	55398	53331	55410	54056	19270	20607	20179	20172	20430	19620		DOXY	1883	1946	1842	1765	1598	1758	203	88	259	474	54.4	19.1	25015	25322	25850	25185	24012	23022			4480_2.fcs		18046	2367
																																									4480_3.fcs		17026	2705
Two-way ANOVA	Ordinary																			Two-way ANOVA	Ordinary																				4480_4.fcs		16695	3189
Alpha	0.05																			Alpha	0.05																				4480_5.fcs		17206	2677
																																									4480_6.fcs		16900	2856
Source of Variation	% of total variation	P value	P value summary	Significant?																Source of Variation	% of total variation	P value	P value summary	Significant?																	6678_1.fcs	Rab4A+	49799	1098
Interaction	0.5208	<0.0001	****	Yes																Interaction	0.2363	<0.0001	****	Yes																	6678_2.fcs		51885	1774
Row Factor	0.3079	<0.0001	****	Yes																Row Factor	0.6222	<0.0001	****	Yes																	6678_3.fcs		47734	1358
Column Factor	98.91	<0.0001	****	Yes																Column Factor	98.9	<0.0001	****	Yes																	6678_4.fcs		48932	1264
																																									6678_5.fcs		49909	1637
Within each row, compare columns (simple effects within rows)																				Within each row, compare columns (simple effects within rows)																					6678_6.fcs		49802	1403
																																									9035_1.fcs	Rab4A DN	17299	26530
Number of families	2																			Number of families	2																				9035_2.fcs		20171	29239
Number of comparisons per family	3																			Number of comparisons per family	3																				9035_3.fcs		19292	28623
Alpha	0.05																			Alpha	0.05																				9035_4.fcs		20221	29195
																																									9035_5.fcs		20468	28278
Šídák's multiple comparisons test	Mean Diff.	95.00% CI of diff.	Below threshold?	Summary	Adjusted P Value															Šídák's multiple comparisons test	Mean Diff.	95.00% CI of diff.	Below threshold?	Summary	Adjusted P Value																9035_6.fcs		20403	27443
																																									4480 DOXY_1.fcs	Control with doxycycline	16894	1883
No DOXY																				No DOXY																					4480 DOXY_2.fcs		17740	1946
Control vs. Rab4A+	-32366	-33684 to -31048	Yes	****	<0.0001															Control vs. Rab4A+	1259	335.4 to 2182	Yes	**	0.0051																4480 DOXY_3.fcs		17227	1842
Control vs. Rab4ADN	-2332	-3650 to -1014	Yes	***	0.0003															Control vs. Rab4ADN	-25537	-26460 to -24614	Yes	****	<0.0001																4480 DOXY_4.fcs		17352	1765
Rab4A+ vs. Rab4ADN	30035	28716 to 31353	Yes	****	<0.0001															Rab4A+ vs. Rab4ADN	-26796	-27719 to -25872	Yes	****	<0.0001																4480 DOXY_5.fcs		16799	1598
																																									4480 DOXY_6.fcs		17216	1758
DOXY																				DOXY																					6678 DOXY_1.fcs	Rab4A+ with doxycycline	55603	203
Control vs. Rab4A+	-37494	-38812 to -36176	Yes	****	<0.0001															Control vs. Rab4A+	1616	692.4 to 2539	Yes	***	0.0004																6678 DOXY_2.fcs		54392	88
Control vs. Rab4ADN	-2842	-4160 to -1524	Yes	****	<0.0001															Control vs. Rab4ADN	-22936	-23859 to -22012	Yes	****	<0.0001																6678 DOXY_3.fcs		55398	259
Rab4A+ vs. Rab4ADN	34652	33334 to 35970	Yes	****	<0.0001															Rab4A+ vs. Rab4ADN	-24551	-25475 to -23628	Yes	****	<0.0001																6678 DOXY_4.fcs		53331	474
																																									6678 DOXY_5.fcs		55410	54.4
																																									6678 DOXY_6.fcs		54056	19.1
																																									9035 DOXY_1.fcs	Rab4A DN with doxycycline	19270	25015
																																									9035 DOXY_2.fcs		20607	25322
																																									9035 DOXY_3.fcs		20179	25850
																																									9035 DOXY_4.fcs		20172	25185
																																									9035 DOXY_5.fcs		20430	24012
																																									9035 DOXY_6.fcs		19620	23022

## Sheet: Fig. 1B
Fig. 1B
Separate culture repeats (n = 6)																														Experiment date: 5/12/2022																	Experiment date: 6/28/2023
CD38/Actin																														Separate culture repeats (n = 2)																	Separate culture repeats (n = 4)
	Control						Rab4A+						Rab4ADN								All 6 repeats put together									Wells	1	2	3	4	5	6	7	8	9	10	11	12	13	14	15		Wells	1	2
No DOXY	0.162272	0.127521	0.386517	0.328013	0.05104	0.058039	0.362187	0.368129	1.13599	1.17686	0.454446	0.263413	0.17032	0.166094	0.395016	0.484868	0.07645	0.077814				Experiment Date	2022-05-12		2023-06-28					Gel 2	ladder	4480	4480 DOXY	6678	6678 DOXY	9035	9035 DOXY	ladder	4480	4480 DOXY	6678	6678 DOXY	9035	9035 DOXY	blank		Gel 1	ladder	4480
DOXY	0.158419	0.129877	0.614701	0.483252	0.051423	0.058743	0.425813	0.470346	1.44857	1.28851	0.552756	0.478057	0.18058	0.14685	0.602884	0.44024	0.08973	0.08738				Repeat	Repeat 1	Repeat 2	Repeat 1	Repeat 2	Repeat 3	Repeat 4				Control	Control with doxy	Rab4A+	Rab4A+ with doxy	Rab4A DN	Rab4A DN with doxy		Control	Control with doxy	Rab4A+	Rab4A+ with doxy	Rab4A DN	Rab4A DN with doxy					Control
																					CD38	Control	25365	24973	163296	167400	22456	34758				Repeat 1							Repeat 2										Repeat 1
Two-way RM ANOVA	Matching: Across row																					Control with doxy	26563	24092	283298	259085	22422	32090				This repeat used for figure
Assume sphericity?	No																					Rab4A+	55222	46290	460136	483264	182721	119011		CD38																	CD38
Alpha	0.05																					Rab4A+ with doxy	64816	51200	588012	542380	264768	211065													Well Number	Net Intensity
																						Rab4A DN	35568	24658	196337	245172	40166	37191													2	25365
Source of Variation	% of total variation	P value	P value summary	Significant?	Geisser-Greenhouse's epsilon																	Rab4A DN with doxy	31433	20300	306093	204485	47243	40573													3	26563
Row Factor x Column Factor	0.5119	0.6144	ns	No																	Actin	Control	156312	195834	422481	510345	439968	598870													4	55222
Row Factor	1.305	0.6162	ns	No																		Control with doxy	167676	185499	460871	536128	436029	546276													5	64816
Column Factor	39.16	<0.0001	****	Yes	0.5226																	Rab4A+	152468	125744	405053	410640	402074	451804													6	35568
Subject	48.77	<0.0001	****	Yes																		Rab4A+ with doxy	152217	108856	405927	420937	478996	441506													7	31433
																						Rab4A DN	208830	148458	497036	505647	525391	477946													9	24973
Within each row, compare columns (simple effects within rows)																						Rab4A DN with doxy	174067	138236	507715	464485	526501	464330													10	24092
																					CD38/Actin	Control	0.162272	0.127521	0.386517	0.328013	0.0510401	0.0580393													11	46290
Number of families	2																					Control with doxy	0.158419	0.129877	0.614701	0.483252	0.0514232	0.0587432													12	51200
Number of comparisons per family	3																					Rab4A+	0.362187	0.368129	1.13599	1.17686	0.454446	0.263413													13	24658
Alpha	0.05																					Rab4A+ with doxy	0.425813	0.470346	1.44857	1.28851	0.552756	0.478057													14	20300
																						Rab4A DN	0.17032	0.166094	0.395016	0.484868	0.0764497	0.0778142
Tukey's multiple comparisons test	Mean Diff.	95.00% CI of diff.	Below threshold?	Summary	Adjusted P Value																	Rab4A DN with doxy	0.18058	0.14685	0.602884	0.44024	0.0897301	0.0873797		Rab4
																																									Well Number	Net Intensity
No DOXY																																									2	68306
Control vs. Rab4A+	-0.4413	-0.8248 to -0.05778	Yes	*	0.0301																Taken from 5/12/2022 repeat 1																				3	94755
Control vs. Rab4ADN	-0.04286	-0.1186 to 0.03285	No	ns	0.2489																																				4	143141
Rab4A+ vs. Rab4ADN	0.3984	0.05690 to 0.7399	Yes	*	0.0285																																				5	1231190
																																									6	255798
DOXY																																									7	590655
Control vs. Rab4A+	-0.5279	-0.8457 to -0.2102	Yes	**	0.0068																																				9	80449
Control vs. Rab4ADN	-0.008542	-0.04892 to 0.03183	No	ns	0.7802																																				10	115334					Rab4
Rab4A+ vs. Rab4ADN	0.5194	0.1690 to 0.8698	Yes	*	0.011																																				11	165249
																																									12	1219459
																																									13	279446
																																									14	598944
																														Actin
																																									Well Number	Net Intensity
																																									2	156312
																																									3	167676
																																									4	152468
																																									5	152217
																																									6	208830
																																									7	174067
																																									9	195834
																																									10	185499
																																									11	125744
																																									12	108856
																																									13	148458
																																									14	138236
																														CD4
																																									Well Number	Net Intensity
																																									2	86693
																																									3	81187					Actin
																																									4	35292
																																									5	50750
																																									6	613027
																																									7	644837
																																									9	58419
																																									10	52315
																																									11	35568
																																									12	46791
																																									13	555428
																																									14	517084
[truncated: 29 more columns]

## Sheet: Fig. 1C-D
Fig. 1C							Fig. 1D

## Sheet: Fig. 1E
Fig. 1E
Healthy donor CD4+ T AAV infection repeats (n = 8 healthy donors)																				Experiment dates: 5/13/2024, 9/25/2024
Rab4/Actin									All 8 repeats put together											Healthy donor CD4+ T AAV infection repeats (n = 8 healthy donors)
	Uninfected	GFP	Rab4	S27N																Wells	1	2	3	4	5	6	7	8	9	10	11	12	13	14	15		Wells	1	2	3	4	5	6	7	8	9	10	11	12
	0.17344	0.210548	2.16741	4.13917							2024-09-25	2024-05-13	2024-09-25	2024-05-13	2024-09-25	2024-05-13	2024-09-25	2024-05-13		Gel 1A	ladder	Uninfected	GFP	Rab4	S27N	other AAV	other AAV	ladder	Uninfected	GFP	Rab4	S27N	other AAV	other AAV	blank		Gel 2A	ladder	Uninfected	GFP	Rab4	S27N	other AAV	other AAV	ladder	Uninfected	GFP	Rab4	S27N
	0.072901	0.073937	0.435448	1.16163							Donor A	Donor A	Donor B	Donor B	Donor C	Donor C	Donor E	Donor D				Donor A CD4+ T 9/25/2024							Donor A CD4+ T 5/13/2024										Donor B CD4+ T 9/25/2024							Donor B CD4+ T 5/13/2024
	0.026507	0.036441	1.11831	2.74025					Rab4	Uninfected	48032	38558	12420	14695	29074	42412	86801	95460
	0.024533	0.059176	1.41162	2.36629						GFP	75602	47375	20413	36176	49797	70528	103120	103710		Rab4																	Rab4
	0.049024	0.072563	1.3698	3.90854						Rab4	866000	256121	601870	857155	819243	1086456	484461	242093														Lane																	Lane
	0.070361	0.117088	1.66127	2.62409						S27N	1510755	694159	1369673	1582854	2078725	1380500	1367527	1635826														L2	48032																L2
	0.162299	0.155718	0.783874	2.41705					Actin	Uninfected	276938	528910	468559	598999	593061	602780	534821	612144														L3	75602																L3
	0.155944	0.241776	0.401083	2.70738						GFP	359073	640748	560160	611333	686259	602350	662221	428950														L4	866000																L4
										Rab4	399555	588178	538196	607216	598074	653992	618034	603599														L5	1510755																L5
Repeated measures ANOVA summary										S27N	364990	597574	499835	668919	531842	526087	565784	604211														L6	1892706																L6
Assume sphericity?	No								Rab4/Actin	Uninfected	0.17344	0.0729008	0.0265068	0.0245326	0.0490236	0.0703606	0.162299	0.155944														L7	463745																L7
F	52.36									GFP	0.210548	0.0739371	0.0364414	0.0591756	0.072563	0.117088	0.155718	0.241776														L9	38558																L9
P value	<0.0001									Rab4	2.16741	0.435448	1.11831	1.41161	1.3698	1.66127	0.783874	0.401083														L10	47375																L10
P value summary	****									S27N	4.13917	1.16163	2.74025	2.36629	3.90854	2.62409	2.41705	2.70738														L11	256121																L11
Statistically significant (P < 0.05)?	Yes																															L12	694159																L12
Geisser-Greenhouse's epsilon	0.4954																															L13	1520066																L13
R squared	0.8821																															L14	523854																L14
									Figure made from 5/13/2024 Donor C
Was the matching effective?																				Actin
F	2.211																															Lane	Volume				Actin
P value	0.0754																															L2	276938																Lane
P value summary	ns																															L3	359073																L2
Is there significant matching (P < 0.05)?	No																															L4	399555																L3
R squared	0.07997																															L5	364990																L4
																																L6	421934																L5
ANOVA table	SS	DF	MS	F (DFn, DFd)	P value																											L7	411032																L6
Treatment (between columns)	37.69	3	12.56	F (1.486, 10.40) = 52.36	P<0.0001																											L9	528910																L7
Individual (between rows)	3.714	7	0.5306	F (7, 21) = 2.211	P=0.0754																											L10	640748																L9
Residual (random)	5.039	21	0.24																													L11	588178																L10
Total	46.45	31																														L12	597574																L11
																																L13	611192																L12
Number of families	1																															L14	620070																L13
Number of comparisons per family	6																																																L14
Alpha	0.05
Tukey's multiple comparisons test	Mean Diff.	95.00% CI of diff.	Below threshold?	Summary	Adjusted P Value
Uninfected vs. GFP	-0.02903	-0.06353 to 0.005470	No	ns	0.0992	A-B
Uninfected vs. Rab4	-1.077	-1.800 to -0.3539	Yes	**	0.0071	A-C
Uninfected vs. S27N	-2.666	-3.741 to -1.591	Yes	***	0.0003	A-D
GFP vs. Rab4	-1.048	-1.770 to -0.3255	Yes	**	0.0082	B-C
GFP vs. S27N	-2.637	-3.703 to -1.571	Yes	***	0.0003	B-D
Rab4 vs. S27N	-1.589	-2.369 to -0.8100	Yes	**	0.0012	C-D
[truncated: 35 more columns]

## Sheet: Fig. 1F
Fig. 1F
Healthy donor CD4+ T AAV infection repeats (n = 8 healthy donors)																				Experiment dates: 5/13/2024, 9/25/2024
CD38/Actin									All 8 repeats put together											Healthy donor CD4+ T AAV infection repeats (n = 8 healthy donors)
	GFP	Rab4	S27N																	Wells	1	2	3	4	5	6	7	8	9	10	11	12	13	14	15		Wells	1	2	3	4	5	6	7	8	9	10	11	12
	0.733349	1.26276	0.377638								2024-09-25	2024-05-13	2024-09-25	2024-05-13	2024-09-25	2024-05-13	2024-09-25	2024-05-13		Gel 1A	ladder	Uninfected	GFP	Rab4	S27N	other AAV	other AAV	ladder	Uninfected	GFP	Rab4	S27N	other AAV	other AAV	blank		Gel 2A	ladder	Uninfected	GFP	Rab4	S27N	other AAV	other AAV	ladder	Uninfected	GFP	Rab4	S27N
	0.22366	0.250986	0.261765								Donor A	Donor A	Donor B	Donor B	Donor C	Donor C	Donor E	Donor D				Donor A CD4+ T 9/25/2024							Donor A CD4+ T 5/13/2024										Donor B CD4+ T 9/25/2024							Donor B CD4+ T 5/13/2024
	0.786859	0.650206	0.683932						CD38	GFP	263326	143309	440767	162283	923169	1150777	513337	57496.3
	0.265458	0.519547	0.447459							Rab4	504542	147624	349938	315477	1627712	1601224	908149	992857		CD38																	CD38
	1.34522	2.72159	1.82963							S27N	137834	156424	341853	299314	973076	1081413	372944	601894														Lane	Volume																Lane
	1.91048	2.44839	2.05558						Actin	GFP	359073	640748	560160	611333	686259	602350	662221	428950														L9	286312																L9
	0.775176	1.46941	0.659162							Rab4	399555	588178	538196	607216	598074	653992	618034	603599														L10	143309																L10
	0.13404	1.64489	0.996166							S27N	364990	597574	499835	668919	531842	526087	565784	604211														L11	147624																L11
									CD38/Actin	GFP	0.733349	0.22366	0.786859	0.265458	1.34522	1.91048	0.775176	0.13404														L12	156424																L12
Repeated measures ANOVA summary										Rab4	1.26276	0.250986	0.650206	0.519547	2.72159	2.44838	1.46942	1.6449														L13	331077																L13
Assume sphericity?	No									S27N	0.377638	0.261765	0.683932	0.447459	1.82963	2.05558	0.659162	0.996166														L14	217251																L14
F	7.146
P value	0.0155
P value summary	*								Figure made from 9/25/2024 Donor C
Statistically significant (P < 0.05)?	Yes
Geisser-Greenhouse's epsilon	0.7416
R squared	0.5052
Was the matching effective?																					Left side of the membrane																	Left side of the membrane
F	12.8																															Lane	Volume																Lane
P value	<0.0001																															L2	232180																L2
P value summary	****																															L3	263326																L3
Is there significant matching (P < 0.05)?	Yes																															L4	504542																L4
R squared	0.76																															L5	137834																L5
																																L6	136981																L6
ANOVA table	SS	DF	MS	F (DFn, DFd)	P value																											L7	106662																L7
Treatment (between columns)	1.568	2	0.7842	F (1.483, 10.38) = 7.146	P=0.0155
Individual (between rows)	9.832	7	1.405	F (7, 14) = 12.80	P<0.0001
Residual (random)	1.536	14	0.1097
Total	12.94	23
Number of families	1
Number of comparisons per family	2
Alpha	0.05																			Actin
																																Lane	Volume				Actin
Dunnett's multiple comparisons test	Mean Diff.	95.00% CI of diff.	Below threshold?	Summary	Adjusted P Value	B-?																										L2	276938																Lane
Rab4 vs. GFP	0.5992	0.02471 to 1.174	Yes	*	0.0423	A	GFP																									L3	359073																L2
Rab4 vs. S27N	0.4571	0.06339 to 0.8507	Yes	*	0.027	C	S27N																									L4	399555																L3
																																L5	364990																L4
																																L6	421934																L5
																																L7	411032																L6
																																L9	528910																L7
																																L10	640748																L9
																																L11	588178																L10
																																L12	597574																L11
																																L13	611192																L12
																																L14	620070																L13
																																																	L14
[truncated: 35 more columns]

## Sheet: Fig. 1G
Fig. 1G														CD3/CD28 CD4+ T cells
Healthy donor PBMC AAV infection repeats (n = 9 healthy donors)														CD38 MFI
CD38 MFI														Experiment Date	2024-05-13				2023-08-10	2023-11-17
	GFP	Rab4A	S27N											Donor ID	Donor A	Donor B	Donor C	Donor D	C-01-025-01	C-01-003-02	C-01-004-03	C-01-007-01	C-01-022-01
	145	292	658											GFP	145	1691	1316	3255	3797	4302	4442	6835	4470
	1691	1744	1443											Rab4	292	1744	1558	3535	4434	4349	4387	6890	4571
	1316	1558	1403											S27N	658	1443	1403	3058	3534	4233	4253	6937	4658
	3255	3535	3058
	3797	4434	3534
	4607	5060	4204
	4619	5108	5866
	7490	7493	6723
	6125	6609	8130
Repeated measures ANOVA summary
Assume sphericity?	No
F	0.9029
P value	0.377
P value summary	ns
Statistically significant (P < 0.05)?	No
Geisser-Greenhouse's epsilon	0.5444
R squared	0.1014
Was the matching effective?
F	69.4
P value	<0.0001
P value summary	****
Is there significant matching (P < 0.05)?	Yes
R squared	0.9689
Number of families	1
Number of comparisons per family	3
Alpha	0.05
Tukey's multiple comparisons test	Mean Diff.	95.00% CI of diff.	Below threshold?	Summary	Adjusted P Value
GFP vs. Rab4A	-309.8	-517.9 to -101.6	Yes	**	0.007	A-B
GFP vs. S27N	-219.3	-1067 to 628.1	No	ns	0.748	A-C
Rab4A vs. S27N	90.44	-694.0 to 874.9	No	ns	0.9423	B-C

## Sheet: Fig. 1H
Fig. 1H
Healthy donor PBMC AAV infection repeats (n = 4 healthy donors)
CD38+ in CD3/CD28 Th1 (CD4+, CD8-, IFNg+, IL-4-)									CD38+ in CD3/CD28 Th2 (CD4+, CD8-, IFNg-, IL-4+)									CD38+ in CD3/CD28 Th17 (CD4+, CD8-, IL-17+)									CD38+ in CD3/CD28 Treg (CD4+, CD8-, CD25+, FoxP3+)									CD38+ in CD3/CD28 IL-2+ CD4+ T (CD4+, CD8-, IL-2+)
Experiment Date: 5/13/2024									Experiment Date: 5/13/2024									Experiment Date: 5/13/2024									Experiment Date: 5/13/2024									Experiment Date: 5/13/2024
	GFP	Rab4A	S27N							GFP	Rab4A	S27N							GFP	Rab4A	S27N							GFP	Rab4A	S27N							GFP	Rab4A	S27N
	28.7	32	37.8							37.6	47.5	43.6							42.9	48.3	52							61.8	61.7	67.2							63	66.2	71.2
	48.6	54.4	52.3							50	51.1	52.4							58.5	56.9	54.7							70.6	70.6	69.5							81.5	80	79.9
	45.5	51.9	47							56.1	59	52.7							60.6	63.1	60.3							73.2	73.3	72.4							82.1	84.1	82.6
	55.2	57.4	56.3							68.1	66.7	67.3							69.8	72.3	69.6							81.1	79.5	77.6							90.9	91.2	91
Repeated measures ANOVA summary									Repeated measures ANOVA summary									Repeated measures ANOVA summary									Repeated measures ANOVA summary									Repeated measures ANOVA summary
Assume sphericity?	No								Assume sphericity?	No								Assume sphericity?	No								Assume sphericity?	No								Assume sphericity?	No
F	3.636								F	1.139								F	0.5978								F	0.04774								F	0.6202
P value	0.1327								P value	0.3789								P value	0.5094								P value	0.8527								P value	0.5059
P value summary	ns								P value summary	ns								P value summary	ns								P value summary	ns								P value summary	ns
Statistically significant (P < 0.05)?	No								Statistically significant (P < 0.05)?	No								Statistically significant (P < 0.05)?	No								Statistically significant (P < 0.05)?	No								Statistically significant (P < 0.05)?	No
Geisser-Greenhouse's epsilon	0.6355								Geisser-Greenhouse's epsilon	0.8958								Geisser-Greenhouse's epsilon	0.5621								Geisser-Greenhouse's epsilon	0.529								Geisser-Greenhouse's epsilon	0.5839
R squared	0.5479								R squared	0.2753								R squared	0.1662								R squared	0.01566								R squared	0.1713
Was the matching effective?									Was the matching effective?									Was the matching effective?									Was the matching effective?									Was the matching effective?
F	48.83								F	35.28								F	33.43								F	28.89								F	58.03
P value	0.0001								P value	0.0003								P value	0.0004								P value	0.0006								P value	<0.0001
P value summary	***								P value summary	***								P value summary	***								P value summary	***								P value summary	****
Is there significant matching (P < 0.05)?	Yes								Is there significant matching (P < 0.05)?	Yes								Is there significant matching (P < 0.05)?	Yes								Is there significant matching (P < 0.05)?	Yes								Is there significant matching (P < 0.05)?	Yes
R squared	0.9169								R squared	0.9274								R squared	0.9331								R squared	0.9343								R squared	0.9601
Number of families	1								Number of families	1								Number of families	1								Number of families	1								Number of families	1
Number of comparisons per family	2								Number of comparisons per family	2								Number of comparisons per family	2								Number of comparisons per family	2								Number of comparisons per family	2
Alpha	0.05								Alpha	0.05								Alpha	0.05								Alpha	0.05								Alpha	0.05
Dunnett's multiple comparisons test	Mean Diff.	95.00% CI of diff.	Below threshold?	Summary	Adjusted P Value	A-?			Dunnett's multiple comparisons test	Mean Diff.	95.00% CI of diff.	Below threshold?	Summary	Adjusted P Value	A-?			Dunnett's multiple comparisons test	Mean Diff.	95.00% CI of diff.	Below threshold?	Summary	Adjusted P Value	A-?			Dunnett's multiple comparisons test	Mean Diff.	95.00% CI of diff.	Below threshold?	Summary	Adjusted P Value	A-?			Dunnett's multiple comparisons test	Mean Diff.	95.00% CI of diff.	Below threshold?	Summary	Adjusted P Value	A-?
GFP vs. Rab4A	-4.425	-8.293 to -0.5571	Yes	*	0.0352	B	Rab4A		GFP vs. Rab4A	-3.125	-12.50 to 6.249	No	ns	0.4332	B	Rab4A		GFP vs. Rab4A	-2.2	-7.765 to 3.365	No	ns	0.3439	B	Rab4A		GFP vs. Rab4A	0.4	-1.155 to 1.955	No	ns	0.5707	B	Rab4A		GFP vs. Rab4A	-1	-4.959 to 2.959	No	ns	0.5802	B	Rab4A
GFP vs. S27N	-3.85	-10.97 to 3.268	No	ns	0.2019	C	S27N		GFP vs. S27N	-1.05	-8.907 to 6.807	No	ns	0.8355	C	S27N		GFP vs. S27N	-1.2	-11.88 to 9.484	No	ns	0.8781	C	S27N		GFP vs. S27N	0	-7.342 to 7.342	No	ns	>0.9999	C	S27N		GFP vs. S27N	-1.8	-10.23 to 6.635	No	ns	0.6623	C	S27N

## Sheet: Fig. S1
Supplementary Fig. S1
Healthy donor CD4+ T AAV infection repeats (n = 5 healthy donors)																		Healthy donor CD4+ T AAV infection repeats (n = 5 healthy donors)
Mander's Overlap Coefficient (CD38 + CD4)																		Mander's Overlap Coefficient (CD4 + LTR)
Unstimulated CD4+ T cells																		Unstimulated CD4+ T cells
	GFP					Rab4					S27N								GFP					Rab4					S27N
	Donor A	Donor B	Donor C	Donor D	Donor E	Donor A	Donor B	Donor C	Donor D	Donor E	Donor A	Donor B	Donor C	Donor D	Donor E				Donor A	Donor B	Donor C	Donor D	Donor E	Donor A	Donor B	Donor C	Donor D	Donor E	Donor A	Donor B	Donor C	Donor D	Donor E
	0.5097	0.711	0.0215	0	0.001	0.3898	0.5151	0.0215	0.5651	0.3181	0.6898	0.1778	0.0028	0.0077	0.0269				0.2327	0.6122	0.2723	0.9377	0.2371	0.6395	0.369	0.4695	0.0321	0.074	0.3059	0.4017	0.5715	0.0208	0.2158
	0.633	0.6122	0.4901	0.014	0.6748	0.3784	0.3587	0.377	0.0692	0.217	0.7641	0.0287	0	0.0558	0.0113				0.2634	0.6368	0.3664	0.3075	0.3601	0.3272	0.2361	0.489	0.0333	0.5747	0.1392	0.1743	0.9242	0.1662	0.8656
	0.5253	0.1151	0.3538	0.0287	0	0.7532	0.0795	0.0048	0.0547	0.1235	0.833	0.0104	0.2637	0.1152	0.0463				0.485	0.4068	0.116	0.2921	0.9738	0.3375	0.5559	0.3497	0.0341	0.0251	0.4006	0.1872	0.1386	0.267	0.8378
	0.6292	0.6088	0.0412	0.8058	0.0442	0.8651	0.7476	0.3781	0.6119	0.268	0.8515	0.4455	0.0253	0.0228	0.055				0.4752	0.2203	0.4129	0.532	0.9696	0.401	0.8272	0.3008	0.0004	0.1407	0.1421	0.1837	0.3484	0.1103	0.9416
	0.6146	0.1067	0.3478	0.0084	0.0178	0.4549	0.1467	0.3362	0.2715	0.0683	0.6535	0.2202	0.167	0.067	0.0015				0.3295	0.7688	0.186	0.223	0.982	0.3683	0.4537	0.1445	0.0065	0.07	0.3935	0.4377	0.0917	0.1354	0.7473
	0.3681	0.105	0.0026	0.0257	0.477	0.3105	0.6625	0.013	0.0907	0.2098	0.6899	0.7201	0.6581	0.1265	0.0067				0.7178	0.4715	0.3364	0.1334	0.2833	0.9883	0.479	0.4112	0.8152	0.5832	0.229	0.1377	0.1837	0.0563	0.9316
	0.7118	0.7016	0.3154	0.6234	0.0064	0.2584	0.0858	0.0279	0.0325	0.2593	0.3955	0.0175	0.5714	0.4061					0.413	0.2561	0.2025	0.1297	0.9009	0.9455	0.2416	0.7337	0.6273		0.9665	0.0441	0.1115	0.0287
	0.2683	0.1689	0.6972	0.022	0.1741	0.6628	0.0752	0.0362	0.4395		0.5312	0.0502	0.592	0.0085					0.8835	0.4352	0.1381	0.116	0.3988	0.3062	0.9932	0.1599	0.3757		0.1762	0.1152	0.1547	0.0734
	0.6106	0.3607	0.1228	0.0264	0.1061	0.5832	0.7237	0.0419	0.1675		0.5086	0.6589	0.6035	0.0611					0.2588	0.3462	0.1337	0.2248	0.8591	0.3014	0.8099	0.3604	0.2544		0.4985	0.2869	0.0834	0.2394
	0.8052	0.6477	0.0884	0.1792		0.8586	0.7551	0.0069	0.4107		0.5515	0.4232	0.0099	0.0706					0.2429	0.2956	0.5295	0.2075		0.5247	0.0516	0.6014	0.0212		0.2555	0.4333	0.0696	0.5962
	0.5949	0.5667	0.1089	0.0303		0.7111	0.1149	0.2446	0.1394		0.7986	0.2868	0.0046	0.1195					0.2158	0.3842	0.1579	0.2267		0.2301	0.7364	0.2774	0.05		0.109	0.0057	0.5792	0.3965
	0.7021	0.5702	0.2268			0.7545	0.2741	0.6917	0.1713		0.5372	0.006	0.0285	0.0374					0.4047	0.6006	0.1127	0.2666		0.2697	0.5658	0.2069	0.0093		0.3317	0.1032	0.0837	0.2404
	0.515	0.7398	0.0124			0.4519	0.7465	0.2434	0.0688		0.7535	0.3887	0.1159	0.7348					0.2757	0.2997	0.1776	0.2587		0.461	0.2544	0.1424	0.7661		0.3933	0.2625	0.1179	0.0622
	0.7591	0.7809	0.0005			0.4675	0.7742	0.0301	0.1536		0.565	0.3347	0.0517	0.1048					0.3903	0.2044	0.2321	0.9757		0.5582	0.4953	0.8384	0.0192		0.1795	0.3365	0.3147	0.1136
	0.8782	0.1799	0.0471			0.4139	0.1827	0.0107	0.0653		0.5841	0.017	0.012	0.1995					0.1625	0.3206	0.3277	0.107		0.4547	0.422	0.4381	0.0259		0.2929	0.3874	0.697	0.0814
	0.8649	0.734	0.435			0.768	0.0782	0.0003	0.0615		0.3749	0.045	0.0461	0.0238					0.1579	0.1134	0.1445	0.3661		0.7966	0.4601	0.4759	0.1195		0.6991	0.1158	0.4065	0.4926
	0.6622	0.0321	0.0169			0.442	0.0425	0.0174	0.0801		0.7798	0.1228	0.198	0.2683					0.1925	0.9857	0.996	0.1281		0.5667	0.0894	0.4798	0.1431		0.3177	0.0472	0.1017	0.0972
	0.7656	0.5897	0.0264			0.4068	0.161	0.0213	0.1521		0.3575	0.0776	0.6162	0.0804					0.3311	0.4314	0.2753	0.4599		0.1975	0.4438	0.4659	0.9774		0.8344	0.149	0.8555	0.2224
	0.5405	0.7237	0.5383			0.7906	0.1061	0.3371	0.363		0.5212	0.5487	0.7169	0.6227					0.273	0.3541	0.2001	0.1687		0.2164	0.393	0.3499	0.0187		0.1981	0.1153	0.5505	0.3429
	0.6786	0.0712	0.0905			0.3629	0.1883	0.0244	0.0684		0.7387		0.1567	0.0421					0.3641	0.8309	0.1812	0.1361		0.4975	0.5852	0.3029			0.1397	0.1709	0.1266	0.152
	0.6575	0.3672				0.7576	0.3826	0.5958	0.0987		0.7852			0.17					0.4264	0.3649		0.1433		0.673	0.8459	0.1607			0.1403	0.0246	0.1209	0.129
	0.6193	0.7537				0.5374	0.1102	0.5289	0.1029		0.7056								0.4373	0.3429				0.478	0.245	0.6568			0.1047	0.3985	0.0297
	0.6754	0.6457				0.793	0.2104	0.6422	0.5015		0.8401								0.2343	0.4389				0.2581	0.2758	0.4342			0.2081	0.4302	0.1527
	0.883	0.3832				0.2409	0.7994	0.5333	0.0677		0.82								0.1751	0.5149				0.966	0.136	0.4521			0.2101	0.5366
	0.6892	0.0972				0.343	0.5553	0.1705			0.5398								0.3389	0.3731				0.1302	0.1503	0.4377			0.2279
	0.5425	0.1012				0.4881	0.0971	0.2405											0.389	0.6016				0.3683	0.3811	0.4541
	0.6408	0.0965				0.7986	0.1321												0.1361	0.6245				0.4215	0.9068
	0.5417					0.3568	0.5588												0.3511					0.3172	0.4727
	0.7057					0.3977													0.226					0.5833
	0.8422					0.7438													0.3706					0.2142
	0.6251					0.4265													0.3491					0.2559
	0.5737					0.7274													0.2349					0.3646
	0.6328					0.6075													0.3304					0.1264
						0.4651																		0.3014
						0.3063																		0.9654
						0.3987																		0.3741
						0.8002																		0.5084
						0.6454																		0.5352
						0.445																		0.4847
						0.4056																		0.4222
						0.4044																		0.5371
						0.3372																		0.3712
						0.6864																		0.4831
ANOVA summary																		ANOVA summary
F	3.429																	F	7.928
P value	0.0364																	P value	0.0006
P value summary	*																	P value summary	***
Significant diff. among means (P < 0.05)?	Yes																	Significant diff. among means (P < 0.05)?	Yes
R squared	0.0654																	R squared	0.1393
Brown-Forsythe test																		Brown-Forsythe test
F (DFn, DFd)	0.6353 (2, 98)																	F (DFn, DFd)	3.326 (2, 98)
P value	0.5319																	P value	0.04
P value summary	ns																	P value summary	*
Are SDs significantly different (P < 0.05)?	No																	Are SDs significantly different (P < 0.05)?	Yes
Bartlett's test																		Bartlett's test
Bartlett's statistic (corrected)	1.599																	Bartlett's statistic (corrected)	12.05
P value	0.4494																	P value	0.0024
P value summary	ns																	P value summary	**
Are SDs significantly different (P < 0.05)?	No																	Are SDs significantly different (P < 0.05)?	Yes
Number of families	1																	Number of families	1
Number of comparisons per family	3																	Number of comparisons per family	3
Alpha	0.05																	Alpha	0.05
Tukey's multiple comparisons test	Mean Diff.	95.00% CI of diff.	Below threshold?	Summary	Adjusted P Value													Tukey's multiple comparisons test	Mean Diff.	95.00% CI of diff.	Below threshold?	Summary	Adjusted P Value
GFP vs. Rab4	0.05821	-0.03104 to 0.1475	No	ns	0.2714	A-B												GFP vs. Rab4	-0.05028	-0.1203 to 0.01973	No	ns	0.2069	A-B
GFP vs. S27N	0.1117	0.009482 to 0.2140	Yes	*	0.0287	A-C												GFP vs. S27N	0.07695	-0.003253 to 0.1572	No	ns	0.0629	A-C
Rab4 vs. S27N	0.05353	-0.04347 to 0.1505	No	ns	0.3912	B-C												Rab4 vs. S27N	0.1272	0.05115 to 0.2033	Yes	***	0.0004	B-C

## Sheet: Fig. 2A
Fig. 2A
Healthy donor CD4+ T AAV infection repeats (n = 5 healthy donors)
Unstimulated CD4+ T cells
Experiment Date: 11/2024
Normalized Mean Grey Value (CD38)																	Normalized Mean Grey Value (mTOR)																	Normalized Mean Grey Value (LTR)
	GFP					Rab4					S27N							GFP					Rab4					S27N							GFP					Rab4					S27N
	Donor A	Donor B	Donor C	Donor D	Donor E	Donor A	Donor B	Donor C	Donor D	Donor E	Donor A	Donor B	Donor C	Donor D	Donor E			Donor A	Donor B	Donor C	Donor D	Donor E	Donor A	Donor B	Donor C	Donor D	Donor E	Donor A	Donor B	Donor C	Donor D	Donor E			Donor A	Donor B	Donor C	Donor D	Donor E	Donor A	Donor B	Donor C	Donor D	Donor E	Donor A	Donor B	Donor C	Donor D	Donor E
	360.673	291.39	371.42	643.821	1369.28	437.523	1539.99	1389.75	849.671	155.31	358.239	660.989	604.079	1047.06	838.04			490.015	723.618	532.096	758.318	151.76	858.9	752.443	625.027	394.701	149.891	401.447	693.97	482.747	1173.54	217.109			296.682	949.708	540.316	691.591	139.368	700.232	944.712	907.827	196.073	66.1964	190.773	675.879	752.631	1245.26	154.256
	542.449	1124.96	275.822	213.198	375.408	1134.38	753.897	483.181	377.744	180.208	372.835	263.464	972.333	700.927	559.149			520.992	1150.43	585.932	425.573	177.656	1019.02	689.707	525.181	408.145	187.917	550.227	588.717	366.94	1439.13	281.97			391.26	1878	555.315	376.88	96.9071	819.322	596.162	901.977	279.26	105.461	302.376	416.316	654.393	1246.04	153.012
	354.078	323.52	640.525	308.774	516.637	631.175	249.074	416.646	196.69	255.467	386.588	396.544	865.053	326.265	1473.78			415.523	643.778	488.528	728.892	151.557	955.675	770.812	588.554	567.578	36.6883	429.974	762.615	447.116	948.651	347.203			419.056	596.14	448.814	879.875	84.2962	699.256	871.84	824.239	320.269	18.8175	270.961	817.904	978.754	900.587	199.207
	744.55	336.212	411.858	238.094	475.508	299.784	408.636	1108.67	174.19	762.33	409.473	767.583	524.125	343.349	1233.69			499.405	657.214	405.007	679.685	148.444	983.356	624.662	581.457	513.683	120.946	514.911	755.681	501.31	717.596	236.605			344.148	622.148	497.654	556.01	141.789	504.556	515.264	1054.05	328.56	85.6411	407.396	1152.62	815.624	780.462	167.433
	450.022	1353.64	242.68	645.833	1438.6	895.059	274.972	512.597	449.573	794.563	255.909	450.414	535.335	298.753	1330.22			488.988	768.58	458.466	737.481	169.223	876.772	671.156	751.907	429.316	110.904	615.137	646.051	352.659	883.798	239.181			252.33	623.813	310.588	896.671	151.234	711.991	983.082	1041.48	276.101	101.946	223.609	613.52	746.856	818.22	127.726
	716.11	352.22	235.797	267.108	390.952	977.695	434.076	477.578	164.977	395.498	244.738	315.677	1286.97	582.96	904.205			443.56	865.791	315.707	595.101	157.815	1056.54	273.417	110.205	362.528	146.155	374.335	637.63	522.993	1053.89	166.225			286.595	622.343	311.149	540.397	146.933	965.51	148.931	148.357	333.976	78.9582	258.277	487.63	1016.27	1295.96	79.5286
	439.895	309.478	313.366	279.984		487.58	557.417	485.941	197.526		528.957	290.537	643.409	269.946	676.783			582.218	949.483	481.93	721.667		930.35	528.299	750.061	472.099		551.282	597.653	438.383	582.11	185.059			360.109	1054.77	420.335	576.959		765.179	433.482	887.844	325.292		302.54	473.04	933.556	574.738	99.2999
	404.092	713.839	464.938	206.316		1422.89	895.9	486.071	211.52		332.923	1101.72	420.206	438.468				409.332	838.455	450.277	435.196		806.879	598.251	560.768	574.247		533.699	598.489	356.193	1177.75				346.497	1307.09	498.283	355.134		514.967	998.907	1038.04	278.133		256.642	597.598	594.683	1471.74
	430.707	538.802	579.739	269.115		793.817	222.156	2358.64	431.361		352.677	335.668	459.468	291.049				516.96	801.14	447.026	480.618		985.101	740.937	832.139	484.267		497.024	678.522	436.854	704.633				291.705	782.514	474.912	367.503		673.76	929.076	1438.88	341.844		388.001	736.591	616.163	639.026
	613.941	547.733	270.644	280.42		445.206	237.597	446.256	158.659		374.375	849.637	786.55	384.439				495.435	655.241	612.612	550.053		853.439	675.155	748.076	409.798		489.146	707.176	416.205	776.583				447.475	456.171	434.103	576.883		611.265	944.791	839.828	201.21		314.64	874.765	826.929	678.245
	243.131	276.097	542.414	252.814		286.925	1073.3	682.995	201.312		430.171	395.453	411.892	286.684				568.36	510.918	512.596	666.412		956.521	402.73	618.917	675.44		291.684	783.266	308.411	839.501				255.225	457.881	456.707	607.816		533.086	138.837	769.859	321.554		218.184	891.622	474.086	768.197
	254.709	771.313	569.432	262.367		362.28	1634.95	428.236	186.163		286.871	349.672	592.367	411.323				361.301	902.172	476.572	478.222		902.191	632.328	654.625	713.311		534.832	835.109	434.543	796.919				235.33	1063.69	557.505	537.384		646.601	912.407	788.633	448.142		191.633	1018.59	718.577	852.4
	829.331	343.118	232.545	619.993		303.2	1233.19	774.311	208.521		328.485	330.915	589.495	264.185				401.958	794.01	300.989	648.735		692.792	626.479	403.923	592.404		552.947	540.15	400.669	710.436				316.632	1145.82	330.199	538.519		551.924	495.226	803.044	369.896		221.927	479.127	735.05	782.57
	223.881	634.287	780.899	255.351		1216.13	1098.59	3323.43	186.479		318.648	578.363	502.311	340.927				611.698	909.676	389.885	561.948		640.87	587.916	662.432	610.216		448.459	793.207	332.216	1171.72				307.987	879.325	449.296	492.568		427.945	467.281	1037.06	327.282		207.923	928.037	725.203	1157.07
	227.843	715.964	303.725	285.76		795.205	1653.66	2213.88	259.33		335.526	302.184	614.39	293.993				391.556	856.619	412.597	737.042		902.774	658.216	604.777	391.339		481.554	676.355	406.418	601.035				208.874	1130.37	336.93	723.811		641.792	363.938	880.89	223.255		308.108	503.434	646.167	492.159
	423.713	591.33	472.468	316.38		449.019	405.497	665.551	147.932		329.622	664.957	459.233	473.751				481.103	771.749	464.759	724.517		880.807	730.447	579.557	273.635		404.811	655.003	426.924	985.13				360.014	664.316	430.545	701.579		581.486	1118.28	1164.46	213.698		238.978	493.513	768.429	1584.23
	233.857	292.063	274.398	396.314		549.674	421.888	466.367	250.494		296.111	669.413	528.762	495.153				491.472	833.176	588.163	736.077		901.222	653.764	650.229	626.47		318.293	628.769	466.069	1851.53				207.435	1159.37	449.118	923.233		493.029	866.506	1137.47	722.589		231.092	441.952	675.631	1522.49
	266.745	1185.83	213.029	381.108		437.421	377.123	699.344	229.819		377.501	279.393	722.799	615.231				323.577	931.427	334.536	639.078		841.572	724.601	660.263	506.375		375.085	406.618	506.781	1175.49				275.594	1029.69	273.33	778.44		600.798	1026.34	959.416	289.842		200.483	409.485	924.38	1456.22
	352.632	412.444	351.717	306.046		2173.96	708.593	596.602	179.661		380.07	353.921	529.73	445.591				632.063	889.089	467.694	637.425		811.018	505.558	820.953	469.341		400.289	773.468	308.413	1154.96				356.323	1067.42	446.589	567.274		576.923	536.183	1368.71	244.713		197.53	874.251	555.784	1285.68
	357.284	823.026	510.459	221.64		1047.43	526.482	647.126	191.544		959.016	571.148	476.568	249.852				538.702	635.84	477.769	454.543		1163.79	587.18	720.212	520.351		515.598	600.474	458.69	532.738				359.912	741.379	546.823	451.039		839.623	792.641	809.912	251.267		283.69	557.948	806.091	573.191
	360.776	968.972	235.401	321.114		613.244	235.839	1540.79	202.301		569.947	438.072	972.679	285.684				615.294	926.432	408.575	644.291		991.682	635.696	760.478	506.234		459.502	710.1	416.65	720.962				359.993	1204.88	384.945	473.221		879.418	564.597	1270.18	312.245		309.148	1075.04	930.232	702.256
	342.857	540.028	404.142	234.385		1270.65	782.339	958.631	210.739		269.68	538.203	580.028	1098.87				592.742	681.031	443.865	531.745		1202.23	556.603	697.545	441.507		503.158	581.452	477.576	889.738				270.527	683.805	376.345	465.638		689.25	421.779	1058.29	273.016		225.006	511.469	787.31	784.25
	505.666	682.585	335.697	917.022		509.048	205.532	446.233	301.011		283.47	282.3	818.994	458.23				490.115	935.004	471.863	762.664		894.926	685.075	852.328	575.291		487.464	680.262	329.661	941.385				320.385	1247.52	354.163	635.799		615.753	803.854	896.889	642.181		179.413	908.671	834.741	962.293
	287.545	329.697	549.204	191.954		808.291	999.402	422.7			549.592	345.955						538.804	873.22	421.081	336.403		1034.28	619.72	1069.28			495.016	712.506						309.773	762.492	348.123	386.685		786.138	583.821	1029.28			313.154	718.428
	249.806		305.709	272.043		325.873	438.691	2334.34			380.262	380.807						416.893		532.451	546.541		902.946	635.994	1051.63			514.24	711.28						246.185		444.211	485.904		487.766	1062.1	1364.75			270.14	638.013
	580.127		238.548			548.666	200.021	833.413			334.872	647.098						537.844		439.67			897.429	529.822	813.614			558.008	1045.16						381.342		296.233			638.193	393.13	1259.85			284.691	990.385
	486.959		341.288			894.932	1233.72				343.623	328.81						465.24		424.611			1047.74	532.026				550.505	818.574						444.736		362.194			729.452	588.163				295.657	711.399
	415.663		377.516			422.256	1788.63				401.089	1047.02						492.627		535.277			1238.69	581.595				603.781	792.146						261.236		483.193			779.35	671.646				334.86	1141.6
	331.499					400.632	197.289				457.01	424.499						473.467					927.448	486.223				509.528	699.229						238.266					636.084	652.42				358.788	701.394
	598.872					521.031	237.74				274.237	399.114						493.754					958.379	769.485				443.134	726.763						320.182					638.633	1116.92				238.655	638.119
						655.842	371.33				390.514	620.111											828.374	470.526				524.67	811.019											806.417	423.233				246.648	1063.43
						468.94	509.667					453.833											1124.86	661.422					697.001											748.201	1155.89					850.615
						452.936						1092.81											1022.71						587.419											1112.18						565.822
						875.504						275.577											1102.14						554											675.943						404.431
						306.786						958.208											1034.75						742.033											578.505						614.404
						1833.09						306.278											977.736						564.954											552.688						428.282
						402.97						402.875											832.947						542.722											679.215						477.2
						1214.91						404.412											1059.06						539.073											631.954						426.803
						1080.77						577.049											1286.23						892.164											675.359						942.349
						469.515						716.493											1136.88						1143.35											948.892						822.45
						800.188																	720.242																	452.585
ANOVA summary																	ANOVA summary																	ANOVA summary
F	10.9																F	20.97																F	14.93
P value	<0.0001																P value	<0.0001																P value	<0.0001
P value summary	****																P value summary	****																P value summary	****
Significant diff. among means (P < 0.05)?	Yes																Significant diff. among means (P < 0.05)?	Yes																Significant diff. among means (P < 0.05)?	Yes
R squared	0.1679																R squared	0.2797																R squared	0.2165
Brown-Forsythe test																	Brown-Forsythe test																	Brown-Forsythe test
F (DFn, DFd)	10.62 (2, 108)																F (DFn, DFd)	7.636 (2, 108)																F (DFn, DFd)	0.6030 (2, 108)
P value	<0.0001																P value	0.0008																P value	0.549
P value summary	****																P value summary	***																P value summary	ns
Are SDs significantly different (P < 0.05)?	Yes																Are SDs significantly different (P < 0.05)?	Yes																Are SDs significantly different (P < 0.05)?	No
Bartlett's test																	Bartlett's test																	Bartlett's test
Bartlett's statistic (corrected)	42.28																Bartlett's statistic (corrected)	31.67																Bartlett's statistic (corrected)	3.591
P value	<0.0001																P value	<0.0001																P value	0.166
P value summary	****																P value summary	****																P value summary	ns
Are SDs significantly different (P < 0.05)?	Yes																Are SDs significantly different (P < 0.05)?	Yes																Are SDs significantly different (P < 0.05)?	No
Number of families	1																Number of families	1																Number of families	1
Number of comparisons per family	3																Number of comparisons per family	3																Number of comparisons per family	3
Alpha	0.05																Alpha	0.05																Alpha	0.05
Tukey's multiple comparisons test	Mean Diff.	95.00% CI of diff.	Below threshold?	Summary	Adjusted P Value												Tukey's multiple comparisons test	Mean Diff.	95.00% CI of diff.	Below threshold?	Summary	Adjusted P Value												Tukey's multiple comparisons test	Mean Diff.	95.00% CI of diff.	Below threshold?	Summary	Adjusted P Value
GFP vs. Rab4	-253.4	-389.5 to -117.2	Yes	****	<0.0001	A-B											GFP vs. Rab4	-208.9	-287.9 to -130.0	Yes	****	<0.0001	A-B											GFP vs. Rab4	-176.2	-253.2 to -99.13	Yes	****	<0.0001	A-B
GFP vs. S27N	-75.94	-212.8 to 60.90	No	ns	0.3879	A-C											GFP vs. S27N	-78.38	-157.7 to 0.9712	No	ns	0.0536	A-C											GFP vs. S27N	-117	-194.4 to -39.49	Yes	**	0.0014	A-C
Rab4 vs. S27N	177.4	51.50 to 303.3	Yes	**	0.0032	B-C											Rab4 vs. S27N	130.5	57.51 to 203.5	Yes	***	0.0001	B-C											Rab4 vs. S27N	59.23	-12.04 to 130.5	No	ns	0.1234	B-C

## Sheet: Fig. 2B
Fig. 2B
Healthy donor CD4+ T AAV infection repeats (n = 5 healthy donors)
CD3/CD28 stimulated CD4+ T cells
Experiment Date: 11/2024
Normalized Mean Grey Value (CD38)																	Normalized Mean Grey Value (mTOR)																	Normalized Mean Grey Value (LTR)
	GFP					Rab4					S27N							GFP					Rab4					S27N							GFP					Rab4					S27N
	Donor A	Donor B	Donor C	Donor D	Donor E	Donor A	Donor B	Donor C	Donor D	Donor E	Donor A	Donor B	Donor C	Donor D	Donor E			Donor A	Donor B	Donor C	Donor D	Donor E	Donor A	Donor B	Donor C	Donor D	Donor E	Donor A	Donor B	Donor C	Donor D	Donor E			Donor A	Donor B	Donor C	Donor D	Donor E	Donor A	Donor B	Donor C	Donor D	Donor E	Donor A	Donor B	Donor C	Donor D	Donor E
	77.3942	459.932	628.656	96.594	419.02	141.753	645.034	372.964	249.214	288.665	133.852	426.076	346.171	267.238	812.387			180.783	254.866	339.003	197.429	140.033	247.989	435.111	310.233	415.31	81.8967	249.282	380.23	172.423	478.22	111.19			52.4917	137.392	431.544	169.276	110.112	86.3925	341.398	386.813	375.92	45.309	68.7298	253.901	135.899	809.488	120.409
	513.656	148.883	630.988	144.174	398.722	142.887	278.918	468.732	237.134	1598.14	216.769	877.744	1006.65	106.807	357.776			165.161	232.727	283.976	211.713	112.082	310.14	534.048	376.234	512.413	100.824	273.576	324.721	210.513	206.422	78.3564			62.9532	173.868	292.525	226.523	75.9429	88.8253	330.998	539.255	428.358	54.426	62.9091	274.249	254.379	205.065	87.3546
	110.927	333.995	425.023	67.0478	409.678	478.387	317.606	908.149	286.298	373.087	275.836	322.563	484.936	125.571	902.463			101.681	331.668	321.498	112.72	122.777	467.598	241.791	471.449	379.965	101.342	467.639	424.557	101.133	330.083	93.1815			27.8659	223.329	372.69	105.635	106.739	128.958	174.806	587.244	488.539	41.1569	140.856	424.484	138.695	171.478	95.7134
	525.023	153.821	463.724	211.886	444.108	470.903	305.8	545.201	321.654	693.067	242.942	433.539	1120.3	137.998	423.718			317.845	289.549	350.799	229.9	209.088	494.869	394.885	315.334	527.36	105.553	319.976	455.016	121.553	351.242	69.4997			219.635	161.844	381.24	232.818	125.09	140.245	380.259	339.223	505.363	69.8562	96.6377	242.148	172.463	339.683	64.8709
	96.0008	238.708	657.163	98.0624	594.322	129.862	740.253	1471.25	387.564	672.105	326.911	367.469	573.097	128.637	542.053			195.088	83.8437	268.15	136.448	176.204	254.796	495.202	473.977	752.636	92.3334	375.364	336.598	160.983	307.504	104.771			60.1597	39.2626	283.901	174.565	84.2311	65.6799	425.305	571.853	686.477	59.882	116.78	336.205	219.62	290.411	84.5651
	82.5697	622.648	558.903	121.416	1086.34	147.163	902.672	4581.87	660.253	197.406	138.538	457.087	1207.73	109.223	313.444			152.011	293.717	346.797	220.389	141.716	305.438	335.314	317.678	965.41	71.4165	287.734	423.994	141.66	350.476	81.5431			44.9554	218.376	375.312	194.526	110.821	104.571	203.053	402.054	693.454	40.4162	80.1331	352.956	136.029	253.519	66.0628
	217.57	247.009	345.804	103.561	720.324	205.971	845.372	2582.79	415.672	312.829	145.722	243.183	540.52	172.763	279.892			292.038	355.077	424.224	145.201	160.046	360.017	362.859	841.079	796.857	79.1198	290.069	296.2	118.086	460.095	51.3494			138.274	302.35	322.037	162.874	120.043	116.498	206.6	1037.22	911.824	75.5758	93.2503	190.022	166.003	253.729	38.8162
	76.0667	382.604	443.139	158.222	879.115	128.153	148.256	352.582	532.458		220.929	371.18	384.757	149.847	772.114			156.871	209.644	487.108	246.616	133.096	245.138	171.263	319.611	538.729		401.714	320.107	157.211	390.566	89.3253			59.8452	142.629	520.811	220.331	88.2339	87.6273	114.839	446.361	543.834		90.8179	302.266	160.101	278.525	101.546
	98.2736	333.838	358.36	151.688	367.057	124.684	305.012	470.195	161.663		145.877	938.377	301.936	136.97				157.778	324.93	444.132	359.105	138.491	401.455	447.412	341.676	476.373		268.201	367.924	136.044	391.462				56.2147	177.877	472.745	309.207	83.9147	126.148	361.46	292.483	329.951		57.2843	287.267	142.67	409.118
	83.7219	159.739	567.079	218.283		484.803	227.487	2047.95	519.228		175.756	640.12	243.516	229.349				179.145	248.367	274.472	635.206		742.781	477.9	425.898	1213.85		391.731	354.116	95.5456	326.782				49.1996	140.437	303.637	587.294		274.97	332.555	405.422	1127.52		121.061	360.322	127.136	254.564
	60.6654	388.656	383.016	135.775		207.266	273.491	3137.34	157.217		160.833	632.455	552.649	516.654				106.81	385.84	222.181	203.397		573.19	322.596	612.024	403.307		262.017	526.466	159.759	154.215				25.7039	258.84	307.967	193.9		151.44	198.88	823.423	371.034		66.4636	346.503	187.069	247.707
	106.902	123.241	400.295	143.162		185.227	777.798	592.725	336.96		265.97	1000.6	1087.24	75.8783				165.677	206.573	413.832	283.78		224.988	268.817	326.824	524.727		276.238	398.28	176.479	232.513				44.9503	125.811	448.542	244.747		76.3267	167.905	430.636	723.011		57.9353	287.213	228.975	186.998
	84.3511	295.187	1420.11	82.1858		164.473	323.494	990.463	297.012		251.497	363.886	346.532	112.661				180.456	291.404	367.742	157.558		314.375	290.619	615.237	698.48		243.175	266.097	186.536	290.747				46.1734	207.883	545.996	144.829		76.2826	203.788	776.941	464.942		58.4953	207.731	198.583	205.804
	77.504	385.924	528.226	174.883		153.912	332.527	570.308	362.201		154.763	1373.04	518.818	298.952				120.806	262.482	438.462	526.322		307.625	196.732	415.763	595.766		164.495	458.474	211.201	847.502				42.2974	209.037	460.227	423.532		82.7721	150.419	671.134	828.643		62.8535	398.825	237.214	876.097
	75.1462	297.279	1401.67	96.2517		296.959	506.452	1488.08	340.282		139.785	1260.99	635.552	349.086				213.235	406.959	382.865	208.751		540.739	390.98	492.038	704.306		289.576	346.764	155.223	1020.86				72.6076	294.681	505.031	213.528		165.074	344.732	858.738	720.961		63.7224	201.345	232.231	945.058
	130.557	519.82	272.275	275.616		154.24	201.913	438.024	631.602		119.122	356.576	1381.06	520.436				166.4	238.752	290.661	323.272		225.714	345.779	215.834	971.322		227.687	245.15	189.781	494.216				46.7066	135.673	219.896	310.767		50.4721	199.706	389.2	764.88		58.2807	176.168	228.43	317.104
	186.119	1150.39	402.557	105.949		301.078	378.821	923.394	441.582		244.255	446.5	346.174	255.43				312.644	363.126	380.271	249.039		529.144	393.886	1027.25	595.873		274.304	309.772	109.244	532.262				103.628	288.416	372.295	218.661		171.936	306.978	1021.06	552.106		89.3493	237.643	187.713	554.175
	93.8683	219.157	671.703	3412.6		237.521	318.558	674.11	533.961		162.395	370.669	508.249	152.93				155.697	405.883	338.565	532.455		427.534	444.969	554.469	1094.62		326.676	284.485	211.76	381.388				43.7108	287.609	356.439	402.346		173.921	333.006	770.199	801.983		82.3078	194.06	320.568	378.414
	59.5192	351.186	603.113	277.556			485.158	608.274	347.156		298.155	311.767	291.889	346.265				89.5929	342.593	407.769	228.151			336.055	628.265	833.194		605.359	339.138	85.7889	551.662				29.4413	242.598	373.001	286.574			242.296	1217.43	637.697		135.676	232.808	164.025	384.496
	85.9752	317.868	426.138	418.358			493.71	664.848	217.869		226.9	348.613	947.107	143.029				188.035	262.867	461.492	282.572			530.307	504.186	433.048		333.96	375.056	146.461	375.546				48.7358	180.343	527.001	545.912			461.714	508.213	398.439		95.7409	390.271	187.714	327.457
	78.4711	220.269		127.097			256.89	532.85	529.532		138.996	365.072	794.608	571.656				181.058	180.192		117.897			295.295	619.226	965.153		268.117	348.438	229.865	138.004				56.6548	140.936		87.9307			245.189	937.74	812.383		70.4989	297.753	306.192	164.706
	89.7455	721.108		182.724			306.164	481.868	988.98		181.695	402.886	654.383	399.312				233.667	512.366		475.208			289.073	466.814	667.986		298.787	255.649	133.929	694.108				45.2645	335.347		321.433			194.011	646.993	742.39		77.0229	215.61	140.412	762.377
	114.737	171.371		86.9002			897.273	1486.72	172.135			191.705	578.022					214.923	247.742		206.808			427.454	449.052	397.776			252.806	167.469					65.8213	183.238		166.258			443.319	480.336	329.717			203.506	265.041
	219.899	445.211		132.425			781.027	230.971	293.623			370.019	857.198					359.656	280.176		322.126			551.973	206.968	703.09			352.076	240.051					103.133	202.302		217.386			472.316	244.36	450.512			257.113	279.604
		399.56		163.81			448.052	339.434	275.622			901.333	1114.2						174.306		134.15			256.952	250.262	641.397			308.778	482.042						126.388		175.742			200.566	367.396	759.105			207.093	491.578
		362.661		187.125			228.213	305.87	1328.09			1176.93	502.131						343.924		225.639			297.945	393.124	1273.2			597.289	133.374						230.336		246.775			158.748	377.37	1692.16			560.154	133.115
		357.562					405.524	537.247	262.349			284.71	563.852						334.802					377.98	390.369	544.451			183.574	119.741						198.021					261.987	368.721	711.311			176.431	153.731
		185.458					1989.92	2237.41	382.364			223.145	1429.94						291.082					391.184	451.423	728.435			332.963	267.319						189.62					315.302	792.392	1008.79			169.924	326.702
		486.915					312.374	399.019	208.506			152.866	798.281						220.791					430.88	364.273	636.243			113.526	278.611						137.447					347.194	480.732	425.101			99.8171	495.669
		660.228					375.959	868.526	748.728			604.997	345.337						306.806					262.808	508.018	901.823			604.336	169.834						209.055					216.816	714.741	721.365			401.455	202.835
		151.358					359.279	1958.47	360.941			517.195	332.464						298.577					388.751	521.137	795.84			340.555	136.343						198.702					235.39	869.14	866.33			243.269	182.876
		265.85					321.561					320.322	610.367						397.601					240.024					529.081	185.486						294.963					149.353					369.295	171.863
							447.473					905.775	666.489											436.929					541.926	182.613											321.092					605.621	240.22
							348.766					683.013	667.992											422.147					401.393	208.215											266.799					328.986	262.989
							710.611						1216.15											728.437						200.541											711.051						308.132
							617.357						1042.09											354.216						308.98											296.218						325.163
							343.79						266.981											285.964						67.9206											211.641						107.023
							315.492						282.095											403.419						138.952											278.687						140.426
							685.569						587.497											406.999						135.283											238.53						154.402
							1323.68						598.684											390.421						133.033											280.564						140.922
							572.17						1096.71											191.248						126.346											238.904						162.696
							291.035						820.896											324.148						430.969											265.383						328.753
							529.608																	804.516																	522.34
ANOVA summary																	ANOVA summary																	ANOVA summary
F	8.988																F	44.12																F	41.33
P value	0.0002																P value	<0.0001																P value	<0.0001
P value summary	***																P value summary	****																P value summary	****
Significant diff. among means (P < 0.05)?	Yes																Significant diff. among means (P < 0.05)?	Yes																Significant diff. among means (P < 0.05)?	Yes
R squared	0.1362																R squared	0.4363																R squared	0.4203
Brown-Forsythe test																	Brown-Forsythe test																	Brown-Forsythe test
F (DFn, DFd)	2.058 (2, 114)																F (DFn, DFd)	6.241 (2, 114)																F (DFn, DFd)	19.05 (2, 114)
P value	0.1324																P value	0.0027																P value	<0.0001
P value summary	ns																P value summary	**																P value summary	****
Are SDs significantly different (P < 0.05)?	No																Are SDs significantly different (P < 0.05)?	Yes																Are SDs significantly different (P < 0.05)?	Yes
Bartlett's test																	Bartlett's test																	Bartlett's test
Bartlett's statistic (corrected)	7.423																Bartlett's statistic (corrected)	19.48																Bartlett's statistic (corrected)	43.59
P value	0.0244																P value	<0.0001																P value	<0.0001
P value summary	*																P value summary	****																P value summary	****
Are SDs significantly different (P < 0.05)?	Yes																Are SDs significantly different (P < 0.05)?	Yes																Are SDs significantly different (P < 0.05)?	Yes
Number of families	1																Number of families	1																Number of families	1
Number of comparisons per family	3																Number of comparisons per family	3																Number of comparisons per family	3
Alpha	0.05																Alpha	0.05																Alpha	0.05
Tukey's multiple comparisons test	Mean Diff.	95.00% CI of diff.	Below threshold?	Summary	Adjusted P Value												Tukey's multiple comparisons test	Mean Diff.	95.00% CI of diff.	Below threshold?	Summary	Adjusted P Value												Tukey's multiple comparisons test	Mean Diff.	95.00% CI of diff.	Below threshold?	Summary	Adjusted P Value
GFP vs. Rab4	-229.8	-365.0 to -94.55	Yes	***	0.0003	A-B											GFP vs. Rab4	-185.6	-242.1 to -129.1	Yes	****	<0.0001	A-B											GFP vs. Rab4	-202.7	-262.1 to -143.4	Yes	****	<0.0001	A-B
GFP vs. S27N	-192.9	-328.9 to -57.02	Yes	**	0.0029	A-C											GFP vs. S27N	-3.698	-60.48 to 53.08	No	ns	0.9869	A-C											GFP vs. S27N	-31.62	-91.26 to 28.02	No	ns	0.4212	A-C
Rab4 vs. S27N	36.84	-88.82 to 162.5	No	ns	0.7662	B-C											Rab4 vs. S27N	181.9	129.4 to 234.4	Yes	****	<0.0001	B-C											Rab4 vs. S27N	171.1	116.0 to 226.2	Yes	****	<0.0001	B-C

[truncated: 59 more sheets: Fig. 2C, Fig. 2D, Fig. S2A, Fig. S2B, Fig. S2C, Fig. S2D, Fig. S2E, Fig. S3A, Fig. S3B, Fig. 3A, Fig. 3B, Fig. 3C, Fig. 4A, Fig. 4B, Fig. S4A, Fig. S4B, Fig. S4C, Fig. S4D, Fig. S4E, Fig. S4F …]
